# Supplementary material for: The Relative Role of Knowledge and Empathy in Predicting Pro-Environmental Attitudes and Behavior
Source: MDPI journal article supplement (doi:10.3390/su14084622), 2022-04-12
Supplement: s1 [file s1]

Archive with 1 entries (1 files):
- sustainability-1552212-supplementary.pdf
