# Supplementary material for: The Relative Role of Knowledge and Empathy in Predicting Pro-Environmental Attitudes and Behavior
Source: MDPI journal article supplement (doi:10.3390/su14084622), 2022-04-12
Supplement: s1 [file s1 › sustainability-1552212-supplementary.pdf]

**Table S1.** Item Means and Standard Deviations for the Environmental Knowledge Survey.

| Item                                                                                                                              | Mean (SD)   |
|-----------------------------------------------------------------------------------------------------------------------------------|-------------|
| What is biodiversity?                                                                                                             | 0.91 (0.29) |
| How many new species are found worldwide each year?                                                                               | 0.36 (0.48) |
| What is the leading cause of species extinction?                                                                                  | 0.88 (0.32) |
| Globally, do you think there is an economic value to increasing biodiversity?                                                     | 0.72 (0.45) |
| Which country has the worst rate of mammal extinction?                                                                            | 0.65 (0.48) |
| Which country has the highest rate of land clearing?                                                                              | 0.05 (0.22) |
| Do zoos help biodiversity?                                                                                                        | 0.74 (0.44) |
| Where in Australia is biodiversity highest?                                                                                       | 0.43 (0.5)  |
| How related do you think the problem of biodiversity and climate change are?                                                      | 0.44 (0.5)  |
| There is estimated to be 1,400,000,000 species on the earth, excluding bacteria. What percentage of species have been identified? | 0.44 (0.5)  |
| Can you name the last Australian animal to go extinct?                                                                            | 0.26 (0.44) |
| What is the largest predator in Australia?                                                                                        | 0.21 (0.41) |
| Honeyeater photo ID                                                                                                               | 0.8 (0.4)   |
| Great knot photo ID                                                                                                               | 0.58 (0.49) |
| Plover photo ID                                                                                                                   | 0.62 (0.49) |
| Finch photo ID                                                                                                                    | 0.69 (0.46) |
| Wagtail photo ID                                                                                                                  | 0.61 (0.49) |
| Woylie photo ID                                                                                                                   | 0.59 (0.49) |
| Dibbler photo ID                                                                                                                  | 0.59 (0.49) |
| Quokka photo ID                                                                                                                   | 0.76 (0.43) |
| Spotted-tail quoll photo ID                                                                                                       | 0.88 (0.33) |
| Pademelon photo ID                                                                                                                | 0.68 (0.47) |
| Hawkesbill turtle photo ID                                                                                                        | 0.69 (0.46) |
| Blue Mountains water skink photo ID                                                                                               | 0.86 (0.35) |
| Olive ridely turtle photo ID                                                                                                      | 0.69 (0.46) |
| Stephen's banded snake photo ID                                                                                                   | 0.84 (0.37) |
| Slender-necked sea snake photo ID                                                                                                 | 0.8 (0.4)   |
| Booroolong frog photo ID                                                                                                          | 0.66 (0.47) |
| Australian lace-lid photo ID                                                                                                      | 0.63 (0.48) |
| Green and golden bell frog photo ID                                                                                               | 0.89 (0.31) |
| Tusked frog photo ID                                                                                                              | 0.36 (0.48) |
| White-lipped tree frog photo ID                                                                                                   | 0.87 (0.34) |
| Cane toad photo ID                                                                                                                | 0.03 (0.16) |
| Australian ant photo ID                                                                                                           | 0.99 (0.08) |

---

|                                      |             |
|--------------------------------------|-------------|
| Pineapple sea cucumber photo ID      | 0.96 (0.19) |
| Aytid shrimp photo ID                | 0.95 (0.21) |
| Giant Australian cuttlefish photo ID | 0.93 (0.26) |
| Wandering glider photo ID            | 0.96 (0.19) |

---

**Table S2.** Item Means and Standard Deviations for the Environmental Attitudes Inventory.

| Item                                                                                                                                  | Mean (SD)   |
|---------------------------------------------------------------------------------------------------------------------------------------|-------------|
| I really like going on trips into the countryside, for example to forests or fields.                                                  | 6.18 (1.25) |
| I think spending time in nature is boring. (R)                                                                                        | 6.38 (1.12) |
| Governments should control the rate at which raw materials are used to ensure that they last as long as possible.                     | 5.9 (1.35)  |
| I am opposed to governments controlling and regulating the way raw materials are used in order to make them last longer. (R)          | 5.6 (1.63)  |
| I would like to join and actively participate in an environmentalist group.                                                           | 4.89 (1.68) |
| I would NOT get involved in an environmentalist organisation. (R)                                                                     | 5.4 (1.73)  |
| One of the most important reasons to keep lakes and rivers clean is so that people have a place to enjoy water sports.                | 2.62 (1.59) |
| We need to keep rivers and lakes clean in order to protect the environmental, and NOT as places for people to enjoy water sports. (R) | 2.04 (1.27) |
| Modern science will NOT be able to solve our environmental problems. (R)                                                              | 4.75 (1.75) |
| Modern science will solve our environmental problems.                                                                                 | 4.5 (1.65)  |
| Humans are severely abusing the environment.                                                                                          | 6.47 (0.98) |
| I do not believe that the environment has been severely abused by humans. (R)                                                         | 6.47 (1.08) |
| I'd prefer a garden that is wild and natural to a well groomed and ordered one. (R)                                                   | 3.02 (1.7)  |
| I'd much prefer a garden that is well groomed and ordered to a wild and natural one.                                                  | 3.17 (1.76) |
| I am NOT the kind of person who makes efforts to conserve nature resources. (R)                                                       | 5.8 (1.29)  |
| Whenever possible, I try to save natural resources.                                                                                   | 5.84 (1.13) |
| Human beings were created or evolved to dominate the rest of nature.                                                                  | 2.09 (1.53) |
| I DO NOT believe human beings were created or evolved to dominate the rest of nature. (R)                                             | 2.06 (1.46) |
| Protecting peoples' jobs is more important than protecting the environment.                                                           | 2.27 (1.29) |
| Protecting the environment is more important than protecting people's jobs. (R)                                                       | 2.39 (1.32) |
| It makes me sad to see natural environments destroyed.                                                                                | 6.24 (1.11) |
| It does NOT make me sad to see forests cleared for agriculture. (R)                                                                   | 6.37 (1.13) |
| Families should be encouraged to limit themselves to two children or less.                                                            | 4.37 (1.95) |
| A married couple should have as many children as they wish, as long as they can adequately provide for them. (R)                      | 4.08 (2.03) |

*Note.* Utilization attitudes items: 1,2(R),3,4(R),5,6(R),11,12(R),21,22(R),23,24(R). Preservation attitudes items: 7,8,9(R),10,13(R),17,18(R),19,20(R). Preservation behaviour items: 15(R), 16.
